# Supplementary material
Source: publisher figshare collection journal article supplement (https://sage.figshare.com/ndownloader/files/18496979)
Supplement: Supplementary file 1 [file 18496979]

Online supplement to the article:

Efficacy of Omega-3/Omega-6 fatty acids in preschool children at risk for ADHD:

A randomized placebo-controlled trial

The first table (**Table S1**) of this online supplement displays the baseline demographic and clinical characteristics of the verum group and the placebo group as well as their comparison between the groups. The analyses showed significant group differences with regard to age and, accordingly, height and weight of the children. As a result, we controlled for age in the analyses on group differences in our outcome measures. **Table S2** contains the results of intention-to-treat univariate analyses of covariance on group differences regarding the subscales of the parent- and teacher-rated outcome measures presented in the article. **Table S3** shows the results of univariate analyses of covariance (ANCOVAs) in a subsample of children with available baseline and post-assessment data. These analyses were performed in addition to the intention-to-treat analyses, which were considered as the primary analytical approach. **Table S4** presents analyses on the clinical significance of our results, that is, it shows the percentage of children with “clinical” and “reliable” improvement in the verum group and in the placebo group and their comparison.

**Table S1***Comparison of baseline demographic and clinical characteristics between verum group and placebo group*

| Variable                       | Verum group |          |           | Placebo group |          |           | <i>t</i> | <i>df</i> | <i>p</i> |
|--------------------------------|-------------|----------|-----------|---------------|----------|-----------|----------|-----------|----------|
|                                | <i>n</i>    | <i>M</i> | <i>SD</i> | <i>n</i>      | <i>M</i> | <i>SD</i> |          |           |          |
| Child age                      | 20          | 5.55     | 0.61      | 20            | 4.97     | 0.93      | -2.36*   | 32.75     | .025     |
| Child height <sup>a</sup> (cm) | 17          | 117.20   | 5.09      | 19            | 110.83   | 8.05      | -2.80*   | 34        | .008     |
| Child weight <sup>a</sup> (kg) | 17          | 22.92    | 4.51      | 19            | 19.70    | 4.48      | -2.15*   | 34        | .039     |
| FBB-ADHS-V – parent rating     |             |          |           |               |          |           |          |           |          |
| Inattention                    | 20          | 1.25     | 0.69      | 20            | 1.57     | 0.66      | -1.51    | 38        | .14      |
| Hyperactivity/Impulsivity      | 20          | 1.59     | 0.67      | 20            | 1.90     | 0.52      | -1.61    | 38        | .12      |
| Total score                    | 20          | 1.43     | 0.62      | 20            | 1.75     | 0.56      | -1.70    | 38        | .10      |
| FBB-ADHS-V – teacher rating    |             |          |           |               |          |           |          |           |          |
| Inattention (teacher)          | 20          | 1.80     | 0.53      | 20            | 1.96     | 0.84      | 0.48     | 38        | .64      |
| Hyperactivity/Impulsivity      | 20          | 1.78     | 0.79      | 20            | 1.84     | 0.65      | -0.70    | 38        | .49      |
| Total score                    | 20          | 1.79     | 0.61      | 20            | 1.84     | 0.65      | -0.28    | 38        | .79      |
| CBCL                           |             |          |           |               |          |           |          |           |          |
| Emotionally Reactive           | 20          | 3.56     | 2.78      | 20            | 4.45     | 3.09      | -0.96    | 38        | .34      |
| Anxious/Depressed              | 20          | 3.65     | 2.60      | 20            | 3.95     | 2.98      | -0.34    | 38        | .73      |
| Somatic Complaints             | 20          | 1.90     | 1.97      | 20            | 2.10     | 1.89      | -0.32    | 38        | .75      |
| Withdrawn                      | 20          | 2.33     | 2.56      | 20            | 2.75     | 2.34      | -0.54    | 38        | .59      |
| Sleep Problems                 | 20          | 1.87     | 2.44      | 20            | 2.85     | 3.36      | -1.06    | 38        | .30      |
| Attention Problems             | 20          | 4.55     | 1.61      | 20            | 5.20     | 2.07      | -1.11    | 38        | .27      |
| Aggressive Behavior            | 20          | 14.47    | 6.95      | 20            | 18.05    | 7.40      | -1.58    | 38        | .12      |
| Internalizing Problems         | 20          | 11.44    | 7.38      | 20            | 13.25    | 7.78      | -0.76    | 38        | .46      |
| Externalizing Problems         | 20          | 19.02    | 7.95      | 20            | 23.25    | 8.69      | -1.61    | 38        | .12      |
| Total Problems                 | 20          | 42.20    | 20.70     | 20            | 51.70    | 23.85     | -1.35    | 38        | .19      |

|                                     |    |        |       |    |        |       |       |    |     |
|-------------------------------------|----|--------|-------|----|--------|-------|-------|----|-----|
| <b>C-TRF</b>                        |    |        |       |    |        |       |       |    |     |
| Emotionally Reactive                | 18 | 2.83   | 2.94  | 20 | 3.55   | 1.99  | -0.89 | 36 | .38 |
| Anxious/Depressed                   | 18 | 4.17   | 3.15  | 20 | 3.30   | 2.52  | 0.94  | 36 | .35 |
| Somatic Complaints                  | 18 | 0.78   | 1.93  | 20 | 0.80   | 1.28  | -0.04 | 36 | .97 |
| Withdrawn                           | 18 | 3.44   | 3.31  | 20 | 3.90   | 3.39  | -0.42 | 36 | .68 |
| Attention Problems                  | 18 | 9.44   | 3.87  | 20 | 10.45  | 3.09  | -0.89 | 36 | .38 |
| Aggressive Behavior                 | 18 | 19.78  | 10.79 | 20 | 23.00  | 11.13 | -0.90 | 36 | .37 |
| Internalizing Problems <sup>b</sup> | 18 | 11.22  | 8.30  | 20 | 11.55  | 6.71  | -0.13 | 36 | .89 |
| Externalizing Problems <sup>b</sup> | 18 | 29.22  | 13.81 | 20 | 33.45  | 13.04 | -0.97 | 36 | .34 |
| Total Problems <sup>b</sup>         | 18 | 52.33  | 26.62 | 20 | 58.30  | 22.91 | -0.74 | 36 | .46 |
| <b>K-ABC</b>                        |    |        |       |    |        |       |       |    |     |
| Sequential Processing               | 19 | 98.95  | 12.00 | 17 | 94.82  | 16.04 | 0.88  | 34 | .39 |
| Simultaneous Processing             | 19 | 100.26 | 15.07 | 18 | 95.67  | 18.82 | 0.82  | 35 | .42 |
| Mental Processing                   | 19 | 98.79  | 11.31 | 18 | 94.11  | 13.92 | 1.13  | 35 | .27 |
| Achievement                         | 13 | 97.08  | 12.61 | 12 | 102.67 | 13.29 | -1.08 | 23 | .29 |

*Note.* FBB-ADHS-V = ADHD Parent and Teacher Rating Scale for Preschool Children; CBCL = Child Behavior Checklist; C-TRF = Caregiver-Teacher Report Form; K-ABC = Kaufman Assessment Battery for Children;  $n$  = sample size;  $M$  = mean,  $SD$  = standard deviation,  $t$  = empirical  $t$ -value,  $df$  = degrees of freedom,  $p$  = significance value.

<sup>a</sup>Three missing values in the verum group and one missing value in the placebo group.

<sup>b</sup>Two missing values in the verum group.

\*  $p < .05$ .

**Table S2**

*Mean FBB-ADHS-V, CBCL and C-TRF subscale scores at baseline and post-assessment and ANCOVA results for comparisons between groups at post-assessment (intention-to-treat sample; covariates: age and outcome at baseline)*

| Measure                                          | <i>n</i> | Verum group   |                 | <i>n</i> | Placebo group |                 | <i>F(1)</i> | <i>p</i> | <i>d</i> | 1- $\beta$ |
|--------------------------------------------------|----------|---------------|-----------------|----------|---------------|-----------------|-------------|----------|----------|------------|
|                                                  |          | Baseline      | Post-Assessment |          | Baseline      | Post-Assessment |             |          |          |            |
|                                                  |          | <i>M (SD)</i> | <i>M (SD)</i>   |          | <i>M (SD)</i> | <i>M (SD)</i>   |             |          |          |            |
| FBB-ADHS-V – Inattention (parent)                | 20       | 1.25 (0.69)   | 0.97 (0.43)     | 20       | 1.57 (0.66)   | 1.38 (0.92)     | 1.56        | .22      | 0.39     | 0.23       |
| FBB-ADHS-V – Hyperactivity/Impulsivity (parent)  | 20       | 1.59 (0.67)   | 1.21 (0.47)     | 20       | 1.90 (0.52)   | 1.76 (0.63)     | 6.41*       | .02      | 0.72     | 0.60       |
| FBB-ADHS-V – Inattention (teacher)               | 20       | 1.80 (0.53)   | 0.99 (0.71)     | 20       | 1.71 (0.67)   | 1.62 (0.67)     | 8.89*       | < .01    | 1.03     | 0.89       |
| FBB-ADHS-V – Hyperactivity/Impulsivity (teacher) | 20       | 1.78 (0.79)   | 1.10 (0.69)     | 20       | 1.96 (0.84)   | 1.58 (0.86)     | 1.84        | .18      | 0.38     | 0.22       |
| CBCL – Emotionally Reactive                      | 20       | 3.56 (2.78)   | 1.66 (1.56)     | 20       | 4.45 (3.09)   | 4.48 (3.74)     | 8.72*       | < .01    | 0.83     | 0.73       |
| CBCL – Anxious/Depressed                         | 20       | 3.65 (2.60)   | 1.90 (1.25)     | 20       | 3.95 (2.98)   | 3.21 (3.06)     | 5.10*       | .03      | 0.53     | 0.38       |
| CBCL – Somatic Complaints                        | 20       | 1.90 (1.97)   | 1.57 (1.78)     | 20       | 2.10 (1.89)   | 1.24 (1.50)     | 1.47        | .23      | 0.21     | 0.10       |
| CBCL – Withdrawn                                 | 20       | 2.33 (2.56)   | 1.39 (1.46)     | 20       | 2.75 (2.34)   | 2.99 (2.33)     | 5.86*       | .02      | 0.55     | 0.41       |
| CBCL – Sleep Problems                            | 20       | 1.87 (2.44)   | 1.68 (2.63)     | 20       | 2.85 (3.36)   | 2.53 (2.80)     | 0.13        | .72      | 0.07     | 0.06       |
| CBCL – Attention Problems                        | 20       | 4.55 (1.61)   | 3.36 (1.47)     | 20       | 5.20 (2.07)   | 4.57 (2.45)     | 2.47        | .13      | 0.46     | 0.29       |
| CBCL – Aggressive Behavior                       | 20       | 14.47 (6.95)  | 9.92 (6.10)     | 20       | 18.05 (7.40)  | 15.73 (7.10)    | 4.90*       | .03      | 0.52     | 0.36       |
| C-TRF – Emotionally Reactive                     | 20       | 2.67 (2.87)   | 2.85 (3.28)     | 20       | 3.55 (1.99)   | 4.76 (2.73)     | 3.38        | .07      | 0.66     | 0.53       |
| C-TRF – Anxious/Depressed                        | 20       | 4.07 (3.15)   | 3.16 (3.32)     | 20       | 3.30 (2.52)   | 3.99 (3.25)     | 1.42        | .24      | 0.45     | 0.29       |

|                             |    |               |               |    |               |               |       |     |      |      |
|-----------------------------|----|---------------|---------------|----|---------------|---------------|-------|-----|------|------|
| C-TRF – Somatic Complaints  | 20 | 0.77 (1.83)   | 0.96 (1.96)   | 20 | 0.80 (1.28)   | 1.11 (1.30)   | 0.03  | .86 | 0.04 | 0.05 |
| C-TRF – Withdrawn           | 20 | 3.45 (3.18)   | 2.41 (3.07)   | 20 | 3.90 (3.39)   | 5.66 (6.17)   | 3.20  | .08 | 0.77 | 0.67 |
| C-TRF – Attention Problems  | 20 | 9.64 (3.71)   | 6.17 (4.08)   | 20 | 10.45 (3.09)  | 10.37 (4.64)  | 6.53* | .02 | 0.86 | 0.75 |
| C-TRF – Aggressive Behavior | 20 | 19.12 (10.60) | 14.57 (10.82) | 20 | 23.00 (11.13) | 25.51 (14.61) | 5.43* | .03 | 0.70 | 0.58 |

*Note.* ANCOVAs controlled for age and outcome at baseline. The baseline assessment was conducted prior to the intervention, the post-assessment was performed after the 4-month treatment period. FBB-ADHS-V = ADHD Parent and Teacher Rating Scale for Preschool Children; CBCL = Child Behavior Checklist; C-TRF = Caregiver-Teacher Report Form;  $n$  = sample size;  $M$  = mean;  $SD$  = standard deviation;  $F$  = empirical F-value;  $p$  = significance value;  $d$  = Cohen's  $d$  (effect size) corrected for baseline data, calculated as the difference between adjusted mean scores at ~~12~~4 months divided by the pooled  $SD$  at baseline;  $1-\beta$  = achieved power.

\*  $p < .05$ .

**Table S3**

*Mean scores at baseline and post-assessment and ANCOVA results for comparisons between groups at post-assessment including available data (covariates: age and outcome at baseline)*

| Measure                                          | Verum group |              |                 | Placebo group |              |                 | $F(1)$ | $p$  | $d$  | $1-\beta$ |
|--------------------------------------------------|-------------|--------------|-----------------|---------------|--------------|-----------------|--------|------|------|-----------|
|                                                  | $n$         | Baseline     | Post-Assessment | $n$           | Baseline     | Post-Assessment |        |      |      |           |
|                                                  |             | $M (SD)$     | $M (SD)$        |               | $M (SD)$     | $M (SD)$        |        |      |      |           |
| FBB-ADHS-V – Inattention (parent)                | 15          | 1.31 (0.69)  | 1.03 (0.47)     | 15            | 1.42 (0.59)  | 1.28 (0.67)     | 2.03   | .166 | 0.39 | 0.18      |
| FBB-ADHS-V – Hyperactivity/Impulsivity (parent)  | 15          | 1.75 (0.63)  | 1.31 (0.49)     | 15            | 1.76 (0.49)  | 1.64 (0.58)     | 4.10   | .053 | 0.62 | 0.37      |
| FBB-ADHS-V – total score (parent)                | 15          | 1.54 (0.58)  | 1.18 (0.40)     | 15            | 1.60 (0.49)  | 1.47 (0.57)     | 3.99   | .056 | 0.58 | 0.33      |
| FBB-ADHS-V – Inattention (teacher)               | 14          | 1.60 (0.50)  | 1.17 (0.74)     | 13            | 1.71 (0.66)  | 1.73 (0.69)     | 4.60*  | .043 | 0.79 | 0.51      |
| FBB-ADHS-V – Hyperactivity/Impulsivity (teacher) | 14          | 1.64 (0.83)  | 1.25 (0.68)     | 13            | 1.98 (0.72)  | 1.80 (0.62)     | 3.06   | .094 | 0.49 | 0.24      |
| FBB-ADHS-V – total score (teacher)               | 14          | 1.62 (0.61)  | 1.21 (0.66)     | 13            | 1.86 (0.62)  | 1.77 (0.64)     | 3.65   | .068 | 0.65 | 0.37      |
| CBCL – Emotionally Reactive                      | 16          | 3.82 (2.76)  | 1.81 (1.60)     | 15            | 3.93 (2.71)  | 3.87 (3.52)     | 7.08*  | .013 | 0.74 | 0.51      |
| CBCL – Anxious/Depressed                         | 16          | 3.87 (2.55)  | 1.94 (1.29)     | 15            | 3.67 (2.94)  | 3.20 (3.08)     | 4.44*  | .044 | 0.55 | 0.32      |
| CBCL – Somatic Complaints                        | 16          | 2.07 (2.11)  | 1.69 (1.82)     | 15            | 1.87 (1.60)  | 1.07 (1.10)     | 1.38   | .250 | 0.22 | 0.09      |
| CBCL – Withdrawn                                 | 16          | 2.10 (2.57)  | 1.44 (1.59)     | 15            | 2.60 (2.23)  | 2.73 (1.83)     | 3.89   | .059 | 0.44 | 0.22      |
| CBCL – Sleep Problems                            | 16          | 1.84 (2.29)  | 1.81 (2.74)     | 15            | 2.13 (3.02)  | 2.00 (2.85)     | 0.01   | .941 | 0.02 | 0.05      |
| CBCL – Attention Problems                        | 16          | 4.62 (1.31)  | 3.50 (1.59)     | 15            | 4.87 (2.07)  | 4.20 (1.97)     | 1.40   | .248 | 0.36 | 0.16      |
| CBCL – Aggressive Behavior                       | 16          | 15.21 (6.25) | 10.88 (6.12)    | 15            | 16.47 (7.57) | 14.60 (6.95)    | 3.13   | .088 | 0.43 | 0.22      |

|                                 |    |                |                |    |                |                |        |      |      |      |
|---------------------------------|----|----------------|----------------|----|----------------|----------------|--------|------|------|------|
| CBCL – Internalizing Problems   | 16 | 11.86 (7.30)   | 6.88 (4.72)    | 15 | 12.07 (6.94)   | 10.87 (6.92)   | 6.04*  | .021 | 0.57 | 0.34 |
| CBCL – Externalizing Problems   | 16 | 19.84 (7.04)   | 14.38 (7.40)   | 15 | 21.33 (8.79)   | 18.80 (8.21)   | 3.03   | .093 | 0.44 | 0.22 |
| CBCL – Total Problems           | 16 | 43.94 (19.39)  | 31.06 (18.77)  | 15 | 46.47 (21.29)  | 42.27 (23.98)  | 3.60   | .069 | 0.58 | 0.34 |
| C-TRF – Emotionally Reactive    | 13 | 2.54 (2.18)    | 2.62 (2.84)    | 14 | 4.21 (1.85)    | 4.21 (2.55)    | 0.97   | .335 | 0.54 | 0.27 |
| C-TRF – Anxious/Depressed       | 13 | 3.54 (2.85)    | 2.77 (2.59)    | 14 | 4.07 (2.56)    | 3.29 (2.27)    | 0.38   | .542 | 0.20 | 0.08 |
| C-TRF – Somatic Complaints      | 13 | 0.92 (2.22)    | 0.77 (2.20)    | 14 | 0.86 (1.46)    | 0.86 (1.35)    | 0.05   | .831 | 0.04 | 0.05 |
| C-TRF – Withdrawn               | 13 | 3.08 (3.30)    | 2.62 (3.62)    | 14 | 4.21 (3.07)    | 4.50 (4.07)    | 0.51   | .483 | 0.29 | 0.12 |
| C-TRF – Attention Problems      | 13 | 8.46 (3.91)    | 6.31 (4.55)    | 14 | 10.29 (3.38)   | 9.43 (4.24)    | 1.07   | .311 | 0.36 | 0.15 |
| C-TRF – Aggressive Behavior     | 13 | 16.38 (8.55)   | 15.77 (10.35)  | 14 | 24.29 (11.74)  | 23.43 (12.00)  | 0.15   | .705 | 0.11 | 0.06 |
| C-TRF – Internalizing Problems  | 13 | 10.08 (6.85)   | 8.77 (8.55)    | 14 | 13.36 (7.11)   | 12.86 (8.07)   | 0.39   | .539 | 0.28 | 0.11 |
| C-TRF – Externalizing Problems  | 13 | 24.85 (11.55)  | 22.08 (14.63)  | 14 | 34.57 (13.84)  | 32.86 (15.36)  | 0.21   | .648 | 0.15 | 0.07 |
| C-TRF – Total Problems          | 13 | 43.85 (16.51)  | 39.08 (27.62)  | 14 | 62.43 (24.64)  | 59.43 (29.23)  | 0.05   | .831 | 0.09 | 0.06 |
| K-ABC – Sequential Processing   | 15 | 102.13 (11.04) | 104.80 (11.31) | 10 | 96.20 (18.30)  | 93.70 (11.77)  | 3.55   | .074 | 0.60 | 0.30 |
| K-ABC – Simultaneous Processing | 15 | 104.93 (12.90) | 108.27 (14.97) | 11 | 100.09 (18.27) | 108.45 (10.63) | 0.24   | .630 | 0.14 | 0.06 |
| K-ABC – Mental Processing       | 15 | 102.67 (8.73)  | 106.20 (10.96) | 9  | 98.89 (12.94)  | 104.56 (5.41)  | < 0.01 | .951 | 0.02 | 0.05 |
| K-ABC – Achievement             | 10 | 102.00 (8.00)  | 104.30 (10.40) | 8  | 99.00 (13.44)  | 102.88 (12.33) | < 0.01 | .956 | 0.02 | 0.05 |

*Note.* ANCOVAs controlled for age and outcome at baseline. The baseline assessment was conducted prior to the intervention, the post-assessment was performed after the 4-month treatment period. FBB-ADHS-V = ADHD Parent and Teacher Rating Scale for Preschool Children; CBCL = Child Behavior Checklist; C-TRF = Caregiver-Teacher Report Form; K-ABC = Kaufman Assessment Battery for Children; *n* = sample size; *M* = mean; *SD* = standard deviation; *F* = empirical F-value; *p* = significance value; *d* = Cohen's *d* (effect size) corrected for baseline data, calculated as the difference between adjusted mean scores at ~~12~~4 months divided by the pooled *SD* at baseline; 1- $\beta$  = achieved power.

\*  $p < .05$ .



**Table S4***Clinical and Reliable Change at Post-Assessment*

| Measure            |                      | Verum group <i>n/n</i> (%) |                   | Placebo group <i>n/n</i> (%) |                   | Clinical change |          | Reliable change |          |
|--------------------|----------------------|----------------------------|-------------------|------------------------------|-------------------|-----------------|----------|-----------------|----------|
|                    |                      | Clinically improved        | Reliably improved | Clinically improved          | Reliably improved | $\chi^2$        | <i>p</i> | $\chi^2$        | <i>p</i> |
| Intention-to-treat | FBB-ADHS-V (parent)  | 6/9 (67)                   | 7/20 (35)         | 4/11 (37)                    | 5/20 (25)         | 1.82            | 0.37     | 0.48            | .73      |
|                    | FBB-ADHS-V (teacher) | 10/15 (67)                 | 12/20 (60)        | 3/16 (19)                    | 3/20 (25)         | 7.30            | .01      | 8.64            | < .01    |
| Available data     | FBB-ADHS-V (parent)  | 5/8 (63)                   | 7/15 (47)         | 2/7 (29)                     | 4/15 (27)         | 1.73            | 0.32     | 1.29            | .45      |
|                    | FBB-ADHS-V (teacher) | 5/9 (56)                   | 6/14 (43)         | 2/11 (18)                    | 1/13 (8)          | 3.04            | 0.16     | 4.34            | .08      |

*Note.* FBB-ADHS-V = ADHD Parent and Teacher Rating Scale for Preschool Children; clinically improved = shift from clinical to nonclinical range from baseline to ~~12~~4

months; reliably improved = Reliable Change Index < -1.96; *n* = sample size;  $\chi^2$  = Pearson's chi-square; *p* = significance value; \**p* < .05.

The sample sizes differ between the analyses on clinical improvement and reliable improvement as the analyses on clinical improvement included only data of children with parent- or teacher-rated baseline FBB-ADHS-V scores in the clinically significant range, that is > 90th percentile.
